# Supplementary material for: Biscogniauxone, a New Isopyrrolonaphthoquinone Compound from the Fungus Biscogniauxia mediterranea Isolated from Deep-Sea Sediments
Source: PubMed Central journal article supplement (PMC5128747; doi:10.3390/md14110204), 2016-11-02
Supplement: marinedrugs-14-00204-s001.pdf [file marinedrugs-14-00204-s001.pdf]

# Supplementary Materials: Biscogniauxone, A New Isopyrrolonaphthoquinone Compound from the Fungus *Biscogniauxia mediterranea* Isolated from Deep-Sea Sediments

Bin Wu, Jutta Wiese, Rolf Schmaljohann and Johannes F. Imhoff

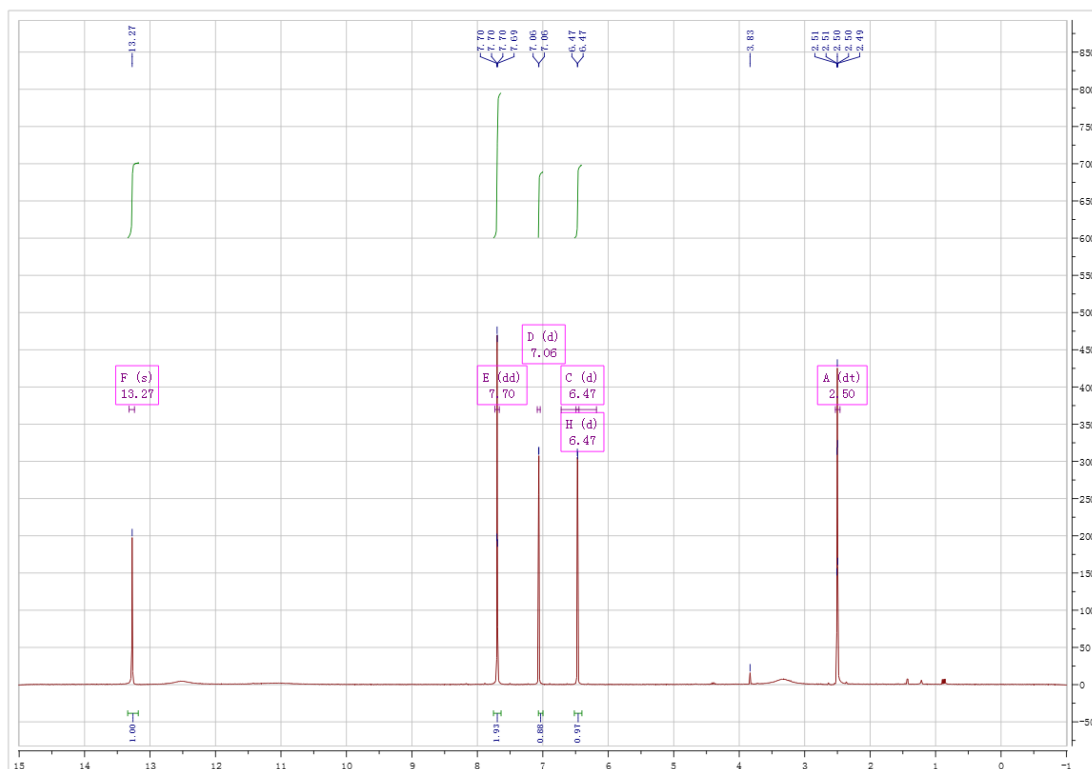

Figure S1.  $^1\text{H}$  NMR in  $\text{DMSO}-d_6$  for compound 1.

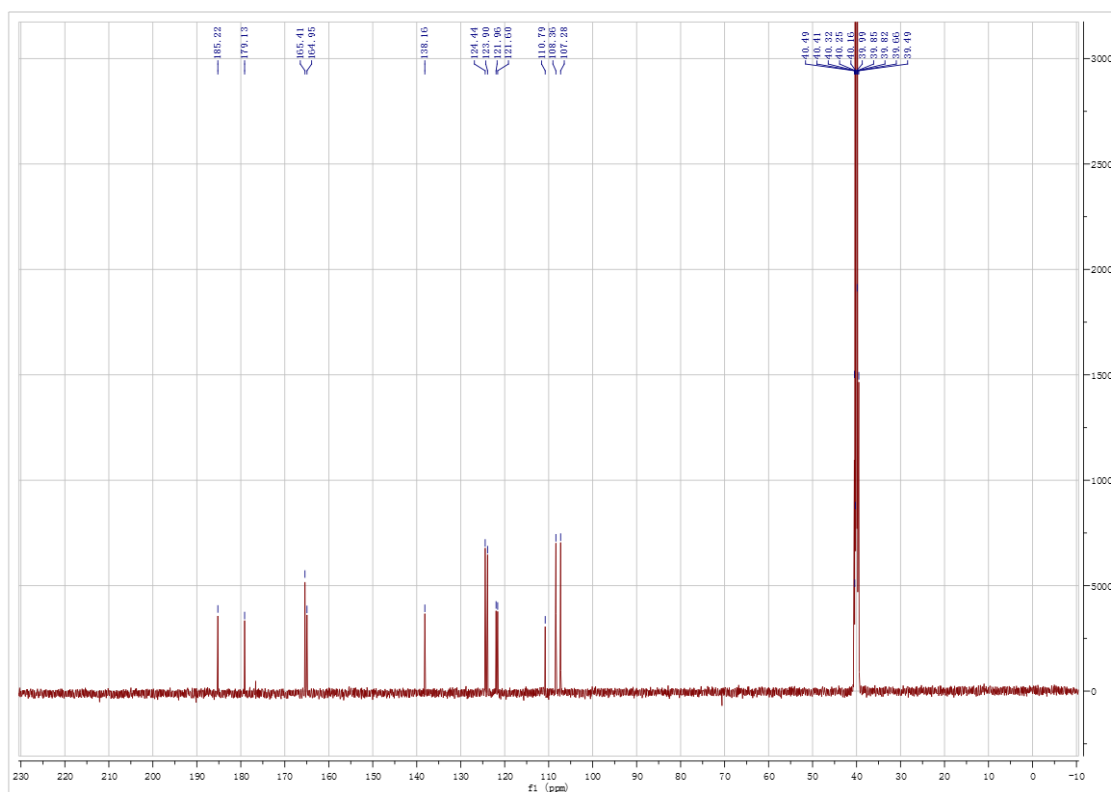

Figure S2.  $^{13}\text{C}$  NMR in  $\text{DMSO-}d_6$  for compound 1.

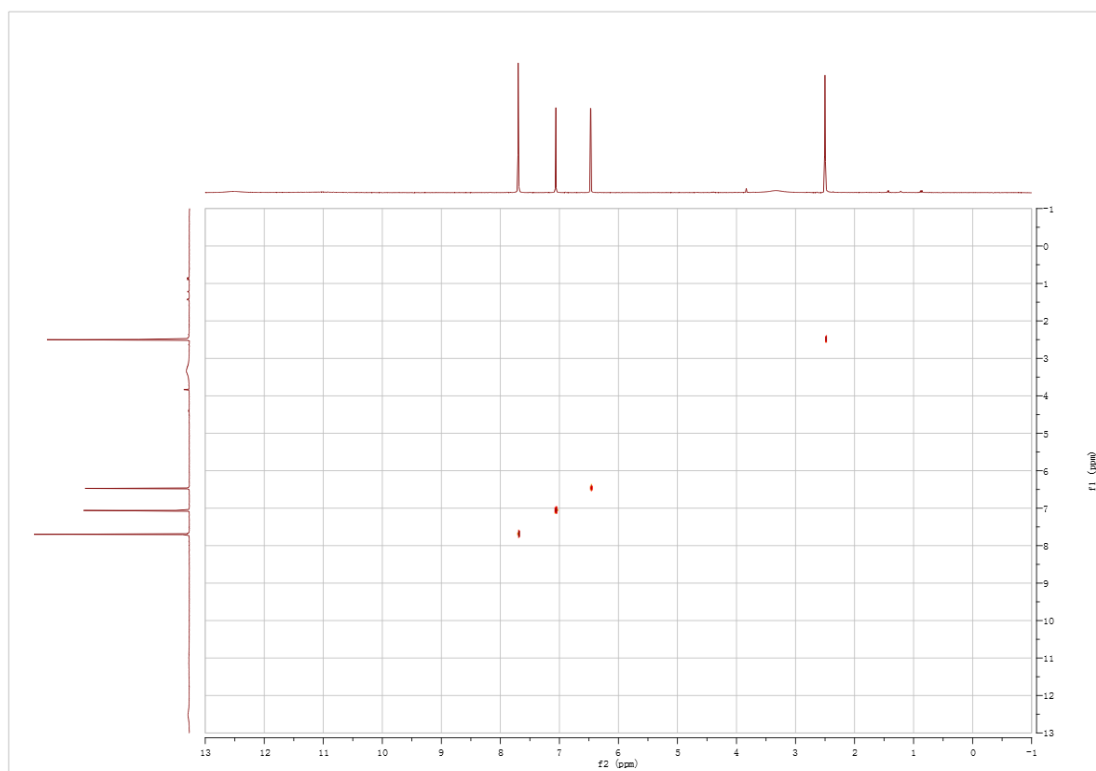

Figure S3. COSY in  $\text{DMSO-}d_6$  for compound 1.

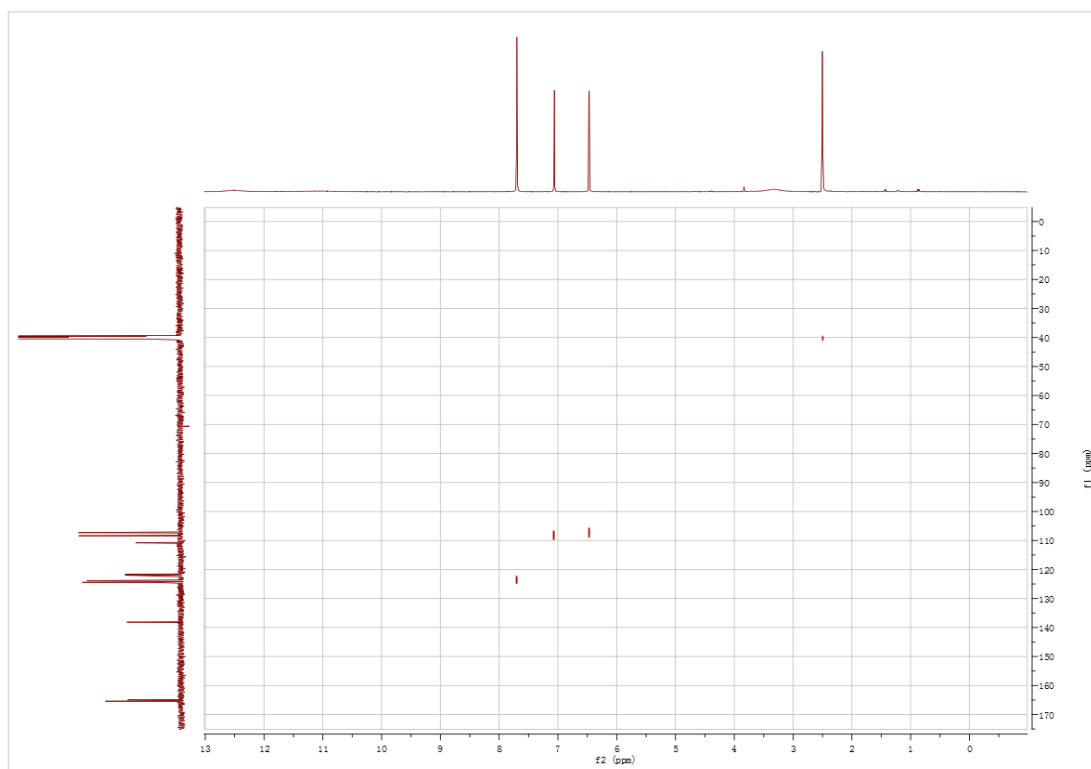

Figure S4. HMQC in DMSO-*d*<sub>6</sub> for compound 1.

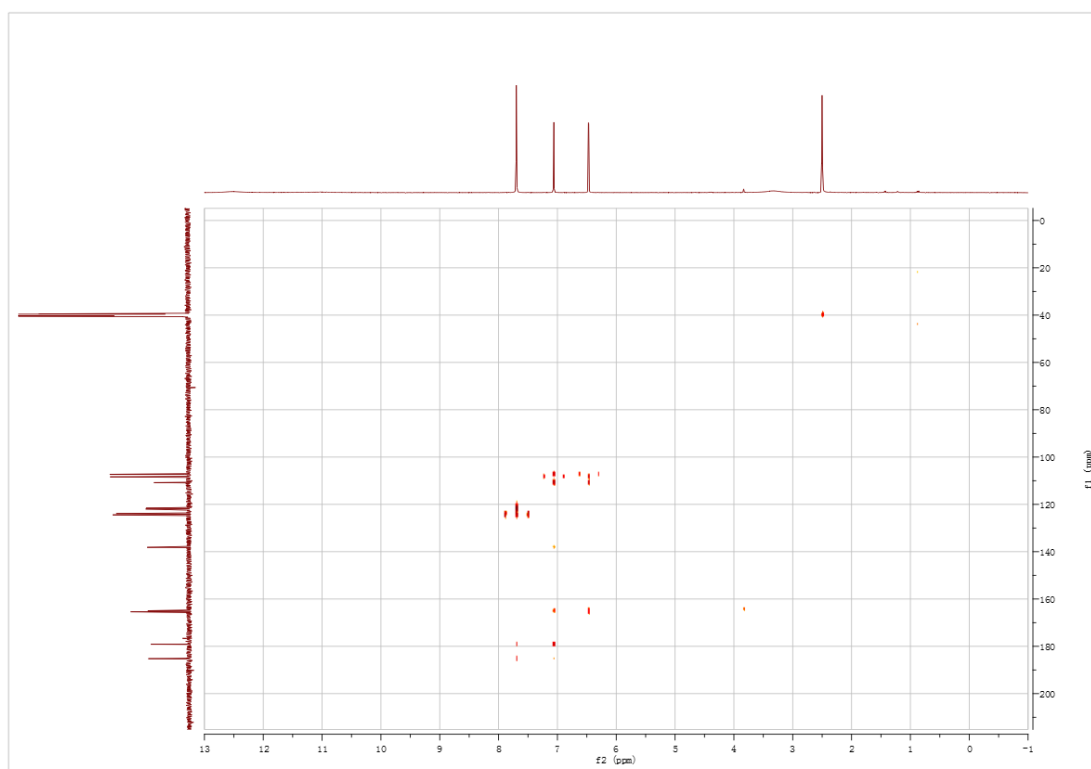

Figure S5. HMBC in DMSO-*d*<sub>6</sub> for compound 1.

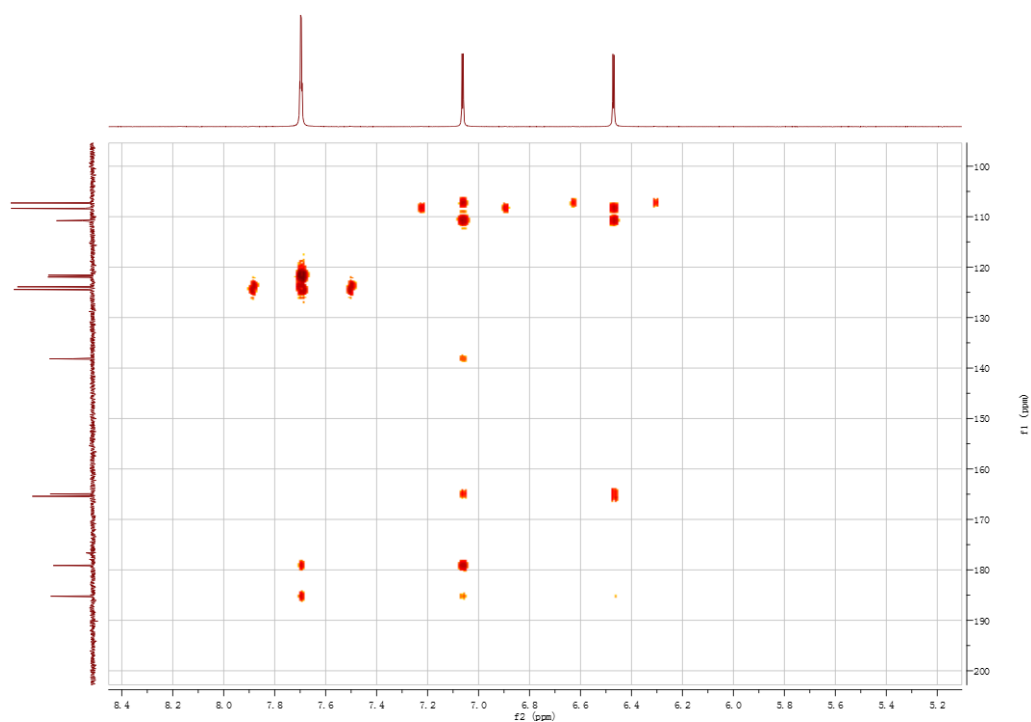

Figure S6. HMBC-2 in DMSO-*d*<sub>6</sub> for compound 1.

**Acquisition Parameter**

|             |          |                      |          |                  |           |
|-------------|----------|----------------------|----------|------------------|-----------|
| Source Type | ESI      | Ion Polarity         | Positive | Set Nebulizer    | 0.8 Bar   |
| Focus       | Active   |                      |          | Set Dry Heater   | 200 °C    |
| Scan Begin  | 50 m/z   | Set Capillary        | 4500 V   | Set Dry Gas      | 5.0 l/min |
| Scan End    | 1000 m/z | Set End Plate Offset | -500 V   | Set Divert Valve | Waste     |

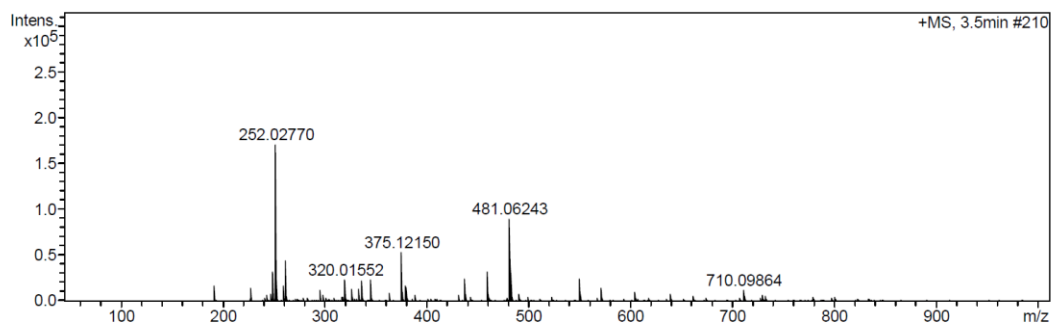

| Meas. m/z | # | Formula                                          | err [ppm] | Mean err [ppm] | rdb  | mSigma |
|-----------|---|--------------------------------------------------|-----------|----------------|------|--------|
| 252.02770 | 1 | C <sub>12</sub> H <sub>7</sub> NNaO <sub>4</sub> | -3.8      | -3.8           | 9.5  | 9.51   |
|           | 2 | C <sub>13</sub> H <sub>3</sub> N <sub>5</sub> Na | 1.5       | 1.5            | 14.5 | 15.57  |

Figure S7. HRESIMS for compound 1.
